# Supplementary material for: Green-solvent-processed hybrid solar cells based on donor–acceptor conjugated polyelectrolyte
Source: Royal Society of Chemistry journal article supplement (doi:10.1039/c8ra07884j), 2018-01-01
Supplement: c8ra07884j1.pdf [file c8ra07884j1.pdf]

## Supporting Information

# Green-Solvent-Processed Hybrid Solar Cells Based on Donor-Acceptor Conjugated Polyelectrolyte

*Shiyu Yao,<sup>a,b</sup> Leijing Liu,<sup>b</sup> Shan Jiang,<sup>b</sup> Wenkun Han,<sup>b</sup> Yang Liu,<sup>b</sup> Wenyue Ma,<sup>b</sup> Yi Liu,<sup>b</sup> Tian*

*Cui,<sup>\*a,d</sup> Wenjing Tian,<sup>\*b,c</sup>*

<sup>a</sup>College of Physics, Jilin University, Changchun 130012, PR China

<sup>b</sup>State Key Laboratory of Supramolecular Structure and Materials, Jilin University, Changchun 130012, P. R. China.

Key Laboratory of Physics and Technology for Advanced Batteries, Ministry of Education, Jilin University, Changchun 130012, P. R. China

<sup>c</sup>State Key Laboratory of Superhard Materials, Jilin University, Changchun 130012, P. R. China.

## List of Contents

**Figure S1.** Synthesis routes of PFBTBr.

**Figure S2.** Synthesis routes of the monomers.

**Figure S3.** UV-vis absorption of PFBTBr without and with annealing.

**Figure S4.** UPS spectra of PFBTBr.

**Figure S5.** TEM images of (a) as-prepared CdTe NCs, (b) the optimized active layer.

**Figure S6.** EQE curve of the PFBTBr:CdTe NCs based HSCs.

**Figure S7.** J-V curve of the PFBTBr:CdTe NCs based HSCs in dark.

**Table S1.** Photovoltaic performances of the cells with different donor/acceptor ratio.

**Table S2.** Photovoltaic performances of the cells with difference concentration of the PFBTBr:CdTe NCs solution concentration.

**Table S3.** Photovoltaic performances of the cells with the active layer annealed at different temperature.

**Table S4.** Photovoltaic performances of the cells with the active layer annealed at 350 °C for different time.

**Table S5.** Photovoltaic performances of the cells with different MoO<sub>3</sub> thicknesses.

**Table S6.** Photovoltaic performances of the cells without and with MgCl<sub>2</sub> treatment.

**Figure S1.** Synthesis routes of PFBTBr: (k)  $(\text{PPh}_3)_4\text{Pd}$ , Toluene,  $\text{K}_2\text{CO}_3$ ; (l)  $\text{CH}_3\text{CH}_2\text{Br}$ , DMSO, THF,  $\text{H}_2\text{O}$ .

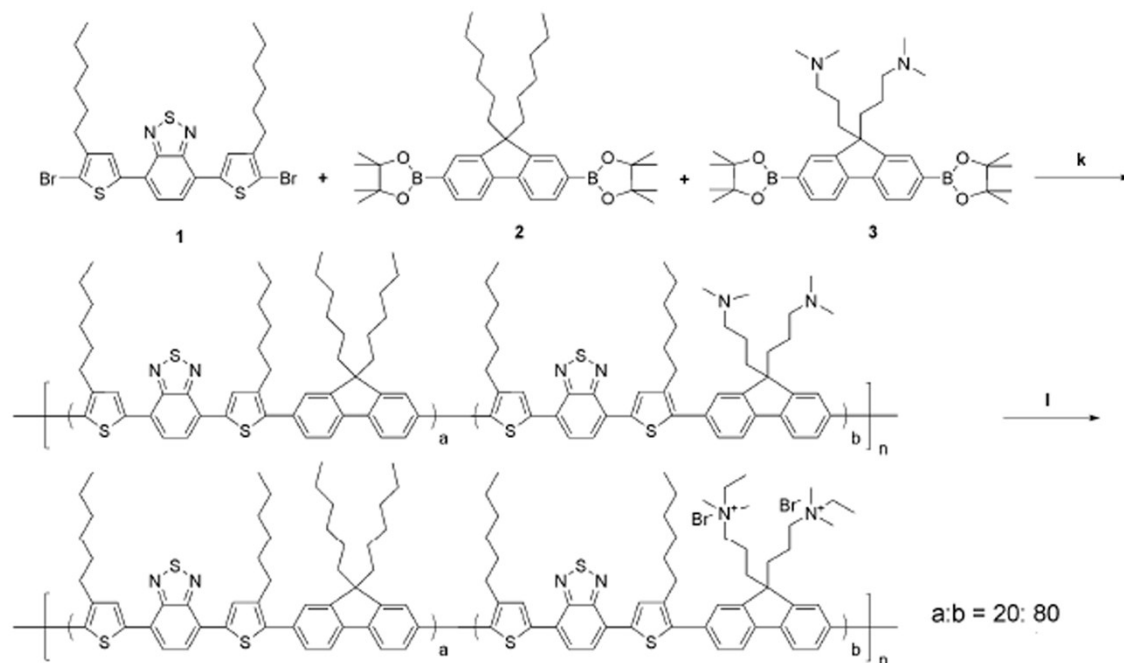

**Figure S2.** Synthesis routes of the monomers: (a) hexylbromide, diethyl ether, Mg, Ni(dppp)Cl<sub>2</sub>; (b) n-BuLi, THF, tributylchloro -stannane, -78°C to -30°C; (c) HBr, Br<sub>2</sub>; (d) THT, PdCl<sub>2</sub>(PPh<sub>3</sub>)<sub>2</sub>; (e) NBS, THF; (f) FeCl<sub>3</sub>, Br<sub>2</sub>; (g)DMSO, Bu<sub>4</sub>NBr, NaOH(50%),n-C<sub>6</sub>H<sub>13</sub>Br (h) DMSO, Bu<sub>4</sub>NBr, NaOH(50%), NaOH(s), (CH<sub>3</sub>)<sub>2</sub>N(CH<sub>2</sub>)<sub>3</sub>·HCl (i) & (j) THF, n-BuLi, 2-Isopropoxy- 4,4,5,5-tetramethyl-1,3,2-dioxaborolane, -78 °C

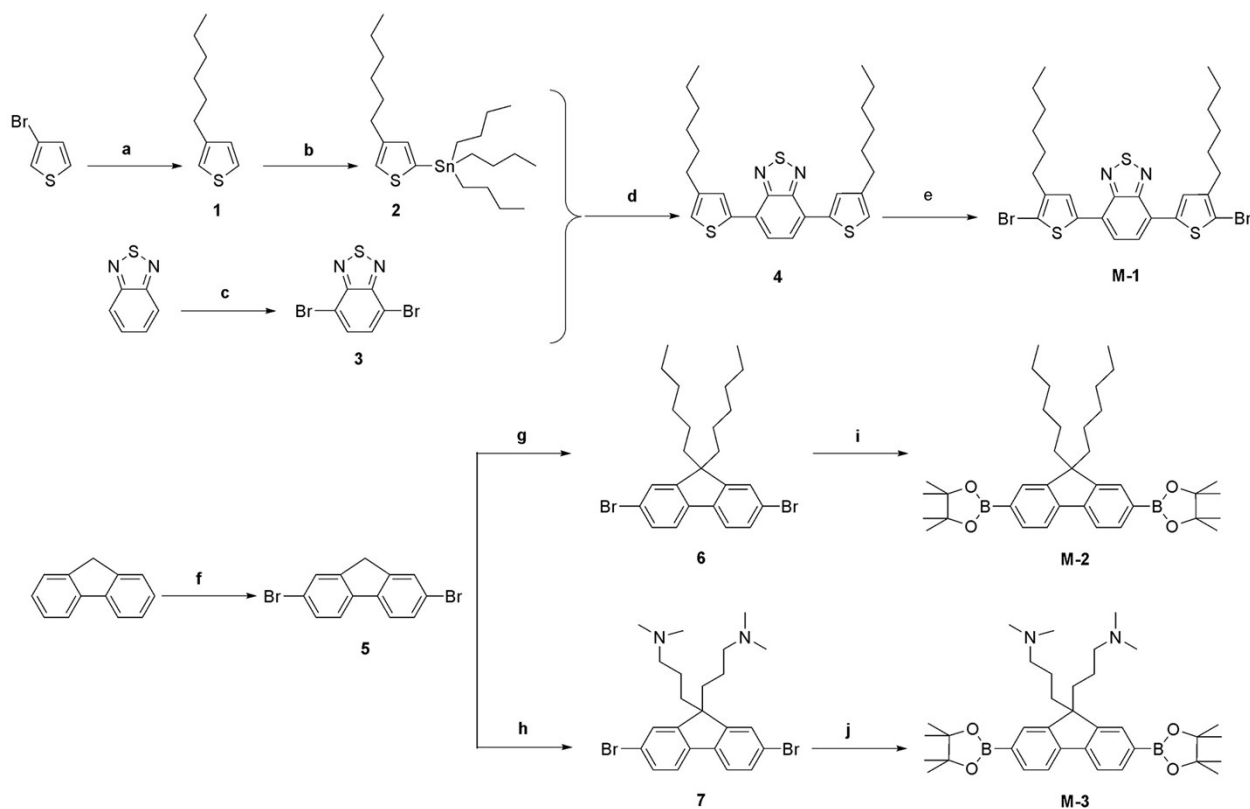

**Figure S3.** UV-vis absorption of PFBTBr without and with annealing.

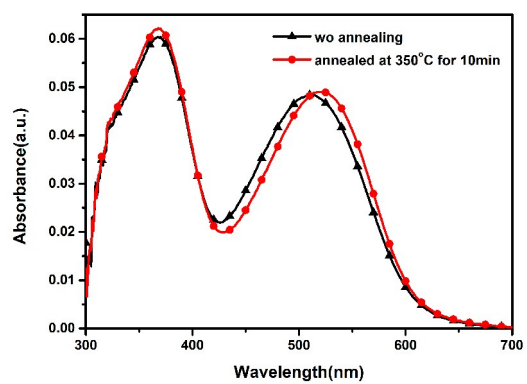

**Figure S4.** UPS spectra of PFBTBr: (a) cutoff regions and (b) Fermi-edge regions. The HOMO level value was calculated by subtracting the onset of the low-binding-energy photoemission from the onset of the secondary electron energy cutoff and then subtracting the excitation photoenergy (21.2 eV).

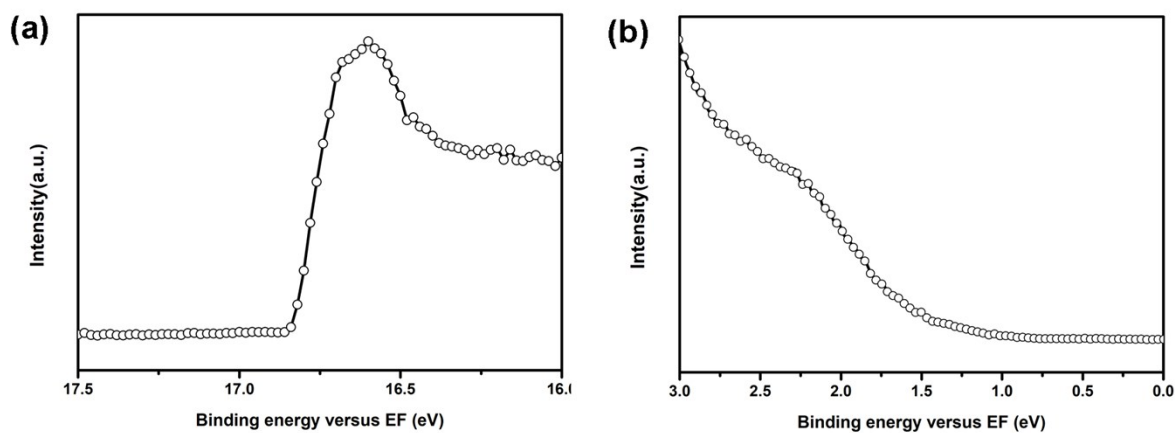

**Figure S5.** TEM images of (a) as-prepared CdTe NCs, (b) the optimized active layer.

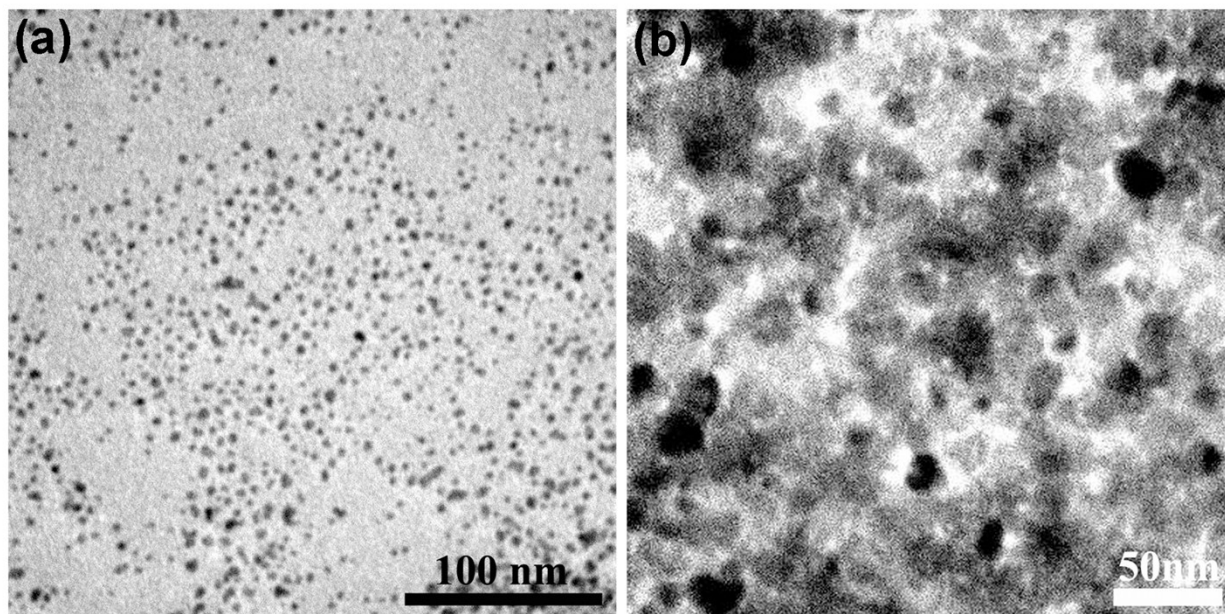

**Figure S6.** EQE curve of the PFBTBr: CdTe NCs based HSCs.

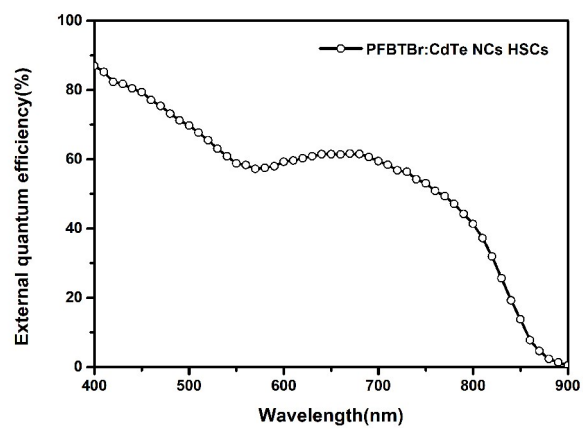



**Figure S7.** J-V curve of the PFBTBr: CdTe NCs based HSCs in dark.

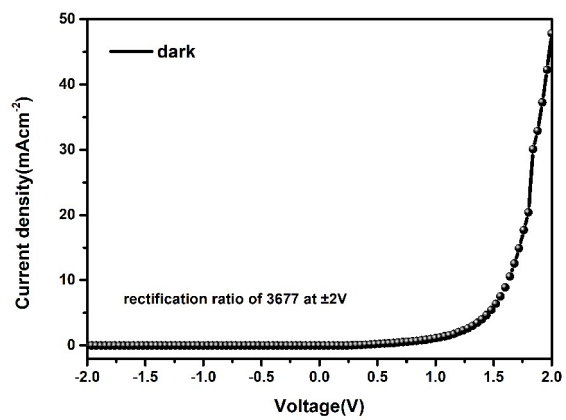

**Table S1.** Photovoltaic performances of the cells with different donor/acceptor ratio.

| Weight ratio | $V_{oc}$ (V) | $J_{sc}$ (mA cm <sup>-2</sup> ) | FF(%) | PCE(%) |
|--------------|--------------|---------------------------------|-------|--------|
| 1:5          | 0.57         | 6.06                            | 22.04 | 0.76   |
| 1:10         | 0.61         | 14.76                           | 32.68 | 2.96   |
| 1:20         | 0.59         | 15.00                           | 29.89 | 2.63   |
| 1:40         | 0.55         | 12.86                           | 33.79 | 2.38   |

**Table S2.** Photovoltaic performances of the cells with difference concentration of the PFBTBr:CdTe NCs solution concentration.

| Concentration (mg mL <sup>-1</sup> ) | $V_{oc}$ (V) | $J_{sc}$ (mA cm <sup>-2</sup> ) | FF(%) | PCE(%) |
|--------------------------------------|--------------|---------------------------------|-------|--------|
| 73.3                                 | 0.59         | 15.10                           | 36.80 | 3.30   |
| 88.0                                 | 0.54         | 14.47                           | 38.55 | 2.98   |
| 109.7                                | 0.50         | 12.14                           | 33.66 | 2.05   |
| 132.0                                | 0.51         | 7.21                            | 36.15 | 1.31   |

**Table S3.** Photovoltaic performances of the cells with the active layer annealed at different temperature.

| Annealing temperature(°C) | V <sub>oc</sub> (V) | J <sub>sc</sub> (mA cm <sup>-2</sup> ) | FF(%) | PCE(%) |
|---------------------------|---------------------|----------------------------------------|-------|--------|
| 300                       | 0.57                | 12.27                                  | 30.85 | 2.16   |
| 350                       | 0.58                | 13.52                                  | 40.39 | 3.16   |
| 400                       | 0.57                | 13.34                                  | 41.52 | 3.10   |
| 450                       | 0.57                | 10.40                                  | 28.57 | 1.70   |

**Table S4.** Photovoltaic performances of the cells with the active layer annealed at 350 °C for different time.

| Annealing time(min) | V <sub>oc</sub> (V) | J <sub>sc</sub> (mA cm <sup>-2</sup> ) | FF(%) | PCE(%) |
|---------------------|---------------------|----------------------------------------|-------|--------|
| 5                   | 0.62                | 11.99                                  | 41.07 | 3.03   |
| 10                  | 0.62                | 13.99                                  | 42.45 | 3.67   |
| 15                  | 0.60                | 12.45                                  | 43.95 | 3.26   |
| 20                  | 0.57                | 10.81                                  | 50.08 | 3.09   |

**Table S5.** Photovoltaic performances of the cells with different MoO<sub>3</sub> thicknesses.

| MoO <sub>3</sub> thickness(nm) | V <sub>oc</sub> (V) | J <sub>sc</sub> (mA cm <sup>-2</sup> ) | FF(%) | PCE(%) |
|--------------------------------|---------------------|----------------------------------------|-------|--------|
| 3                              | 0.59                | 16.65                                  | 37.04 | 3.62   |

|   |      |       |       |      |
|---|------|-------|-------|------|
| 5 | 0.62 | 16.34 | 44.29 | 4.49 |
| 7 | 0.60 | 16.22 | 36.30 | 3.55 |

---

**Table S6.** Photovoltaic performances of the cells without and with MgCl<sub>2</sub> treatment.

| MgCl <sub>2</sub> treatment | V <sub>oc</sub> (V) | J <sub>sc</sub> (mA cm <sup>-2</sup> ) | FF(%) | PCE(%) |
|-----------------------------|---------------------|----------------------------------------|-------|--------|
| w/o                         | 0.62                | 16.34                                  | 44.29 | 4.49   |
| with                        | 0.64                | 20.09                                  | 39.17 | 5.03   |

---
